# Supplementary material for: Variants associating with uterine leiomyoma highlight genetic background shared by various cancers and hormone-related traits
Source: PubMed Central journal article supplement (PMC6128903; doi:10.1038/s41467-018-05428-6), 2018-09-07
Supplement: 41467_2018_5428_MOESM1_ESM.pdf [file 41467_2018_5428_MOESM1_ESM.pdf]

## Supplementary Information

Variants associating with uterine leiomyoma highlight genetic background shared by various cancers and hormone-related traits

Rafnar **et al.**

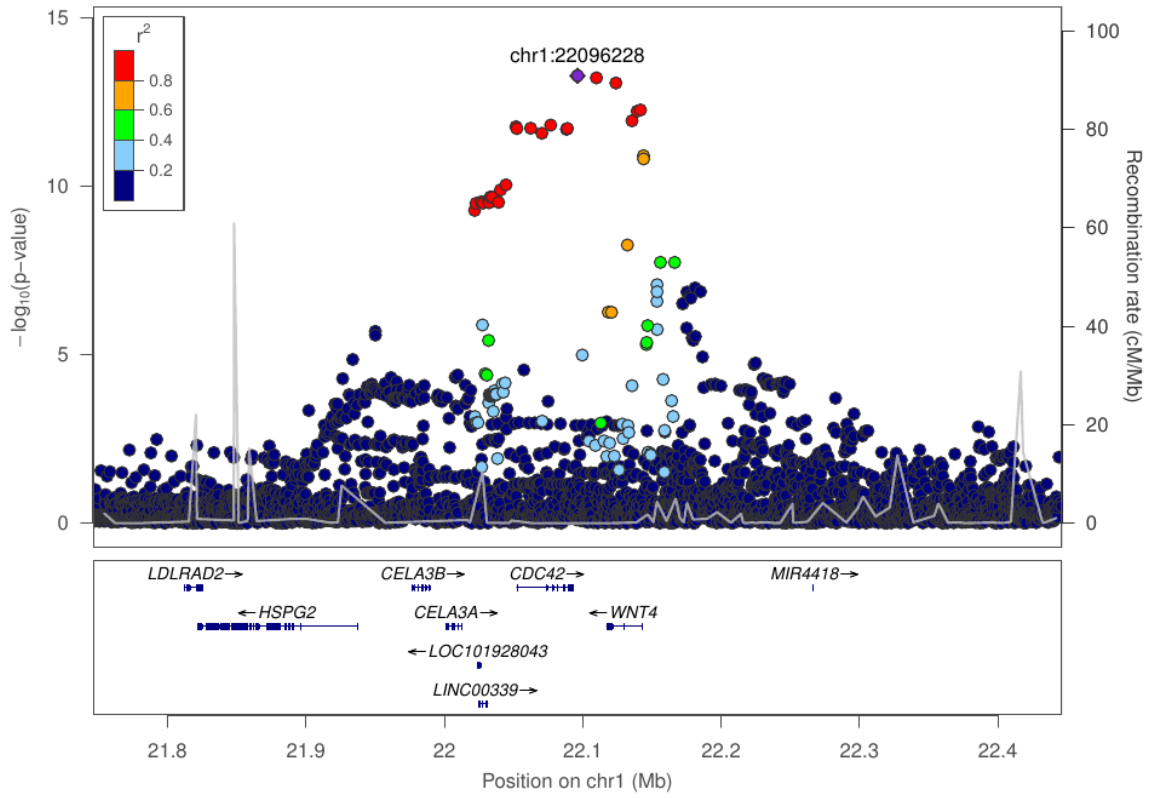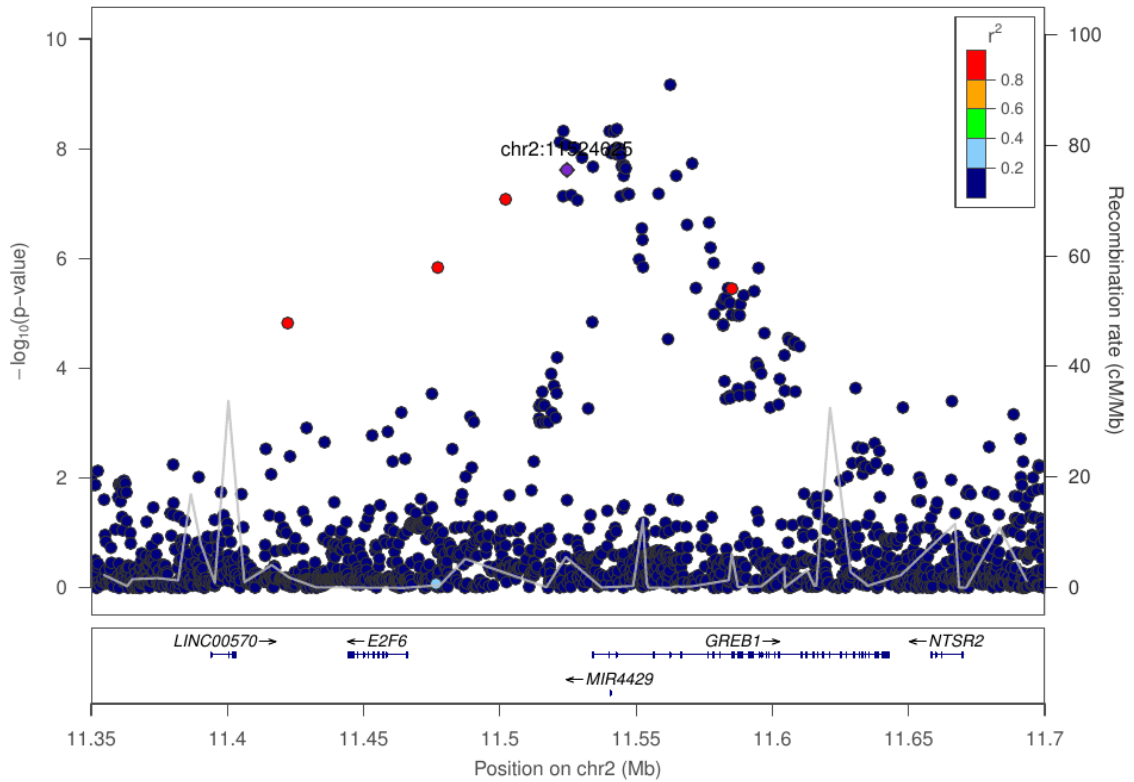

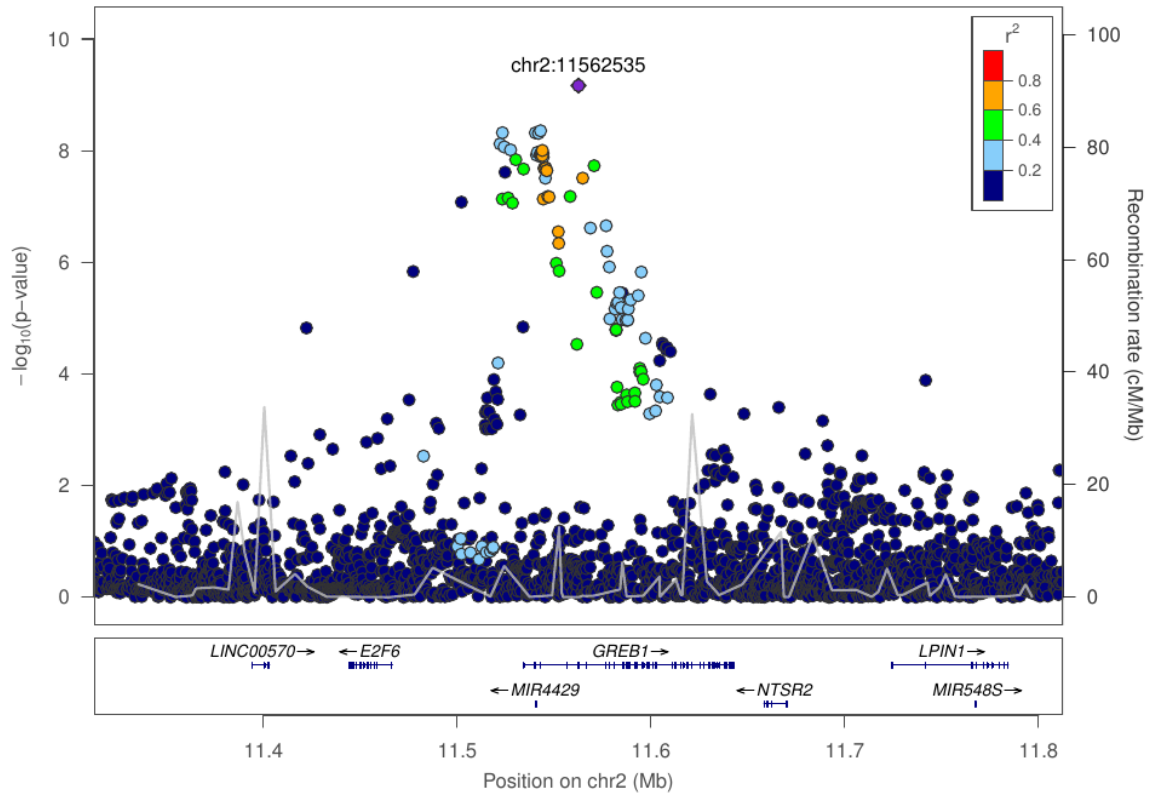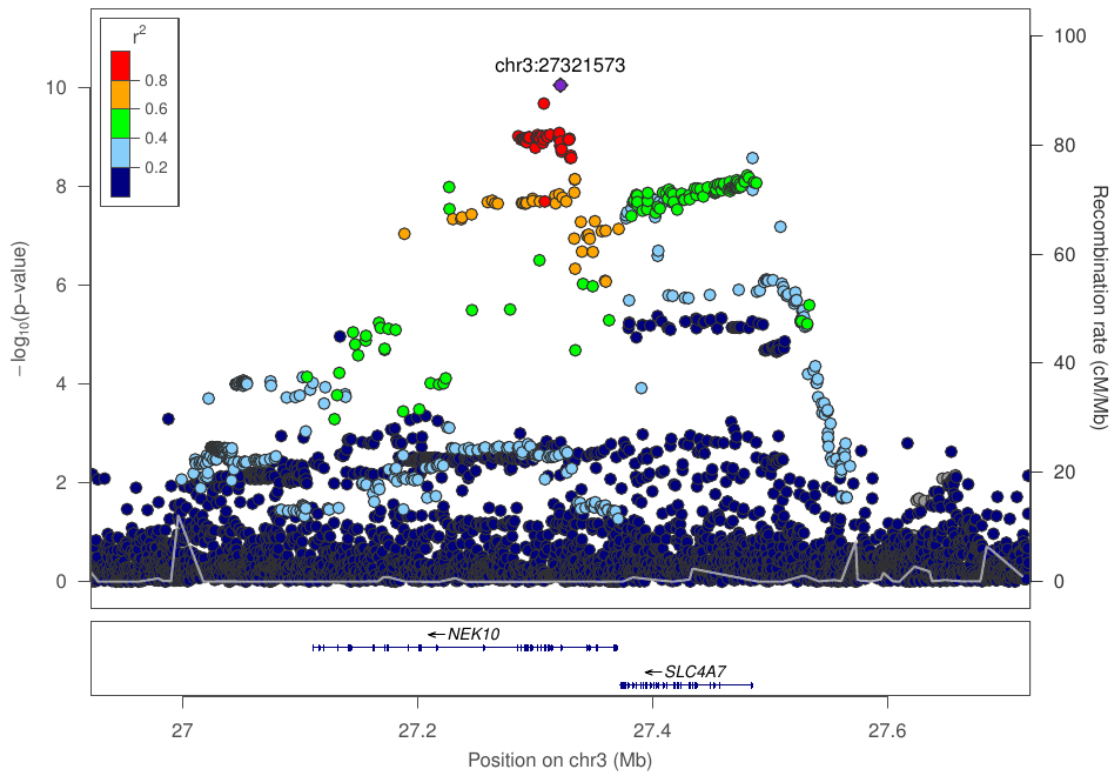



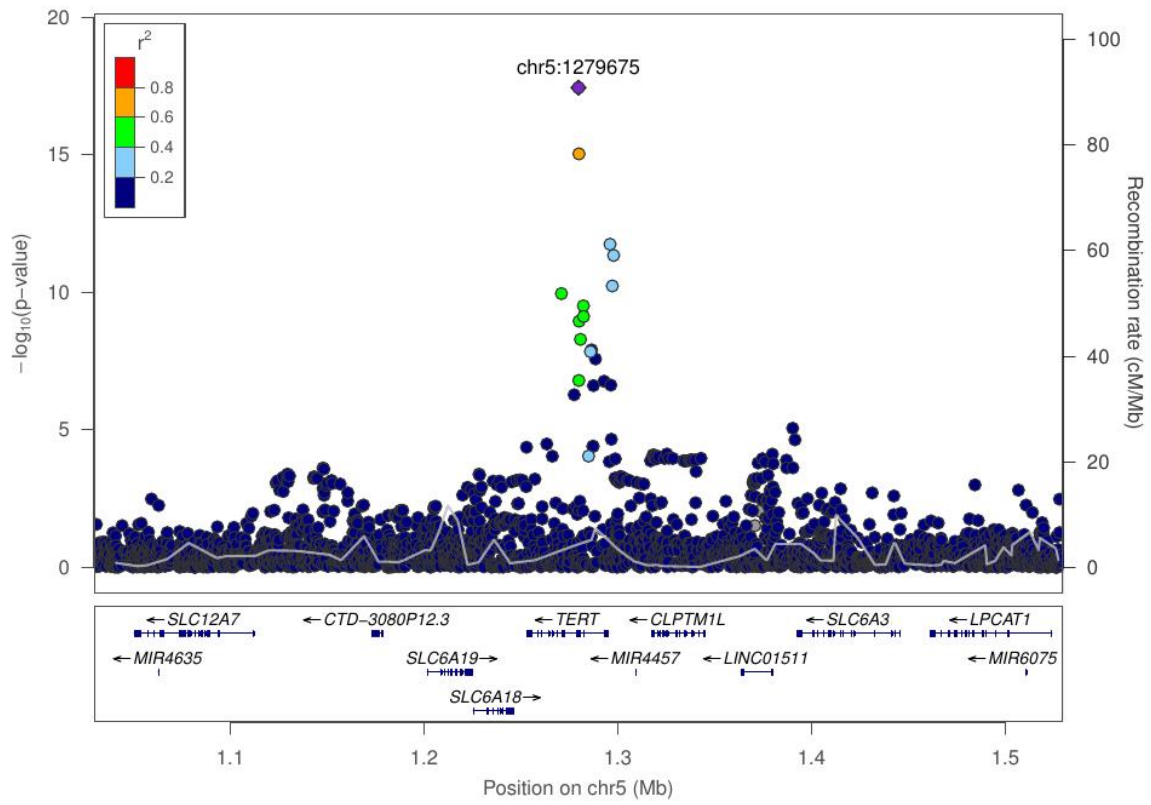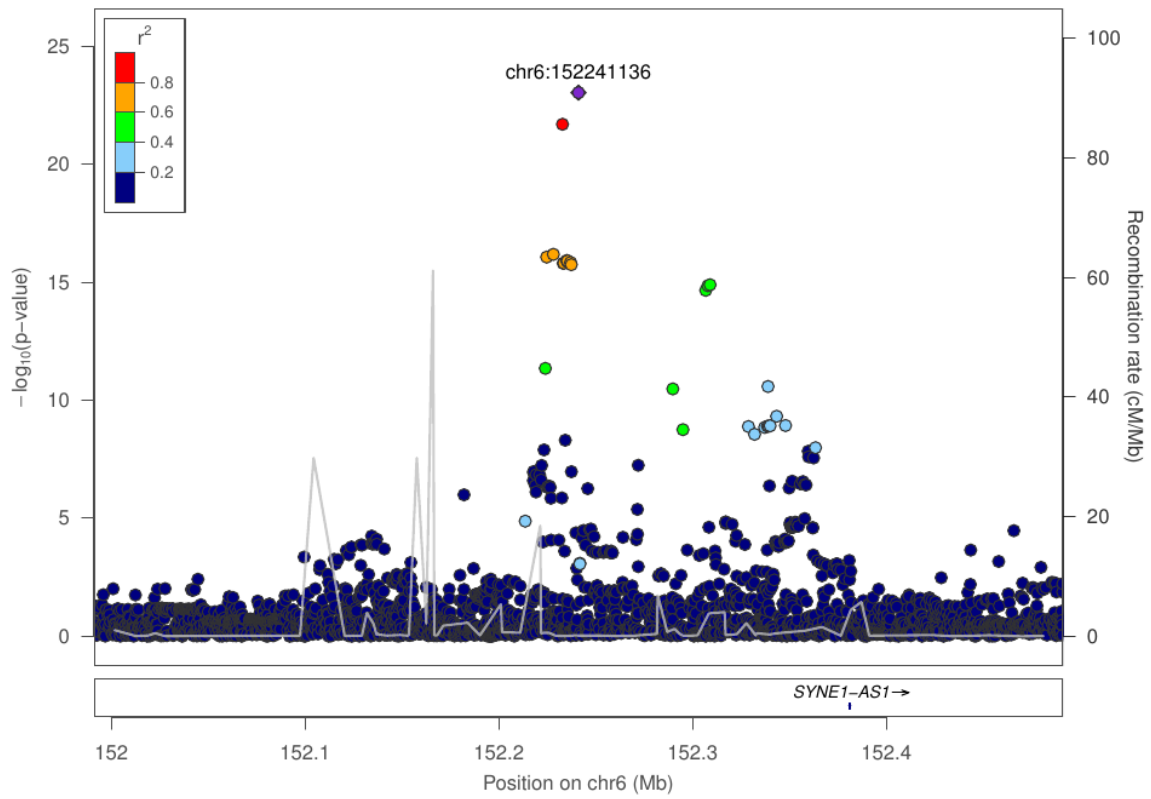

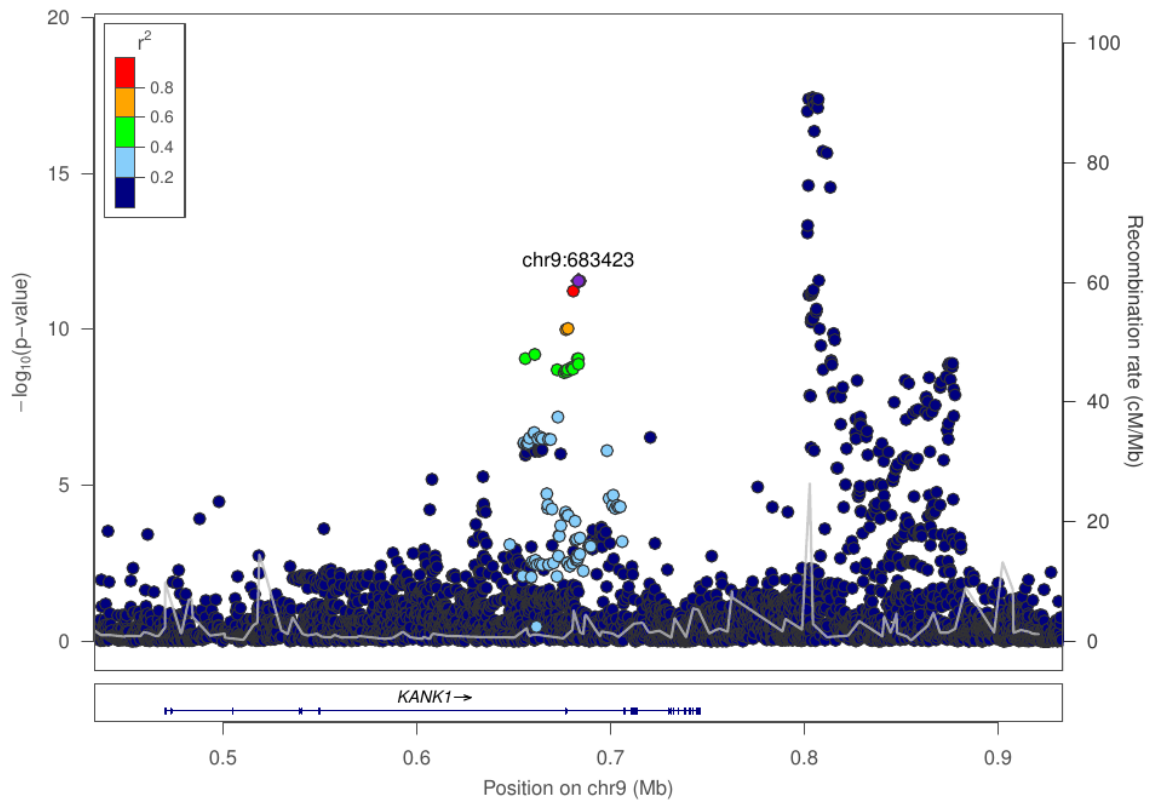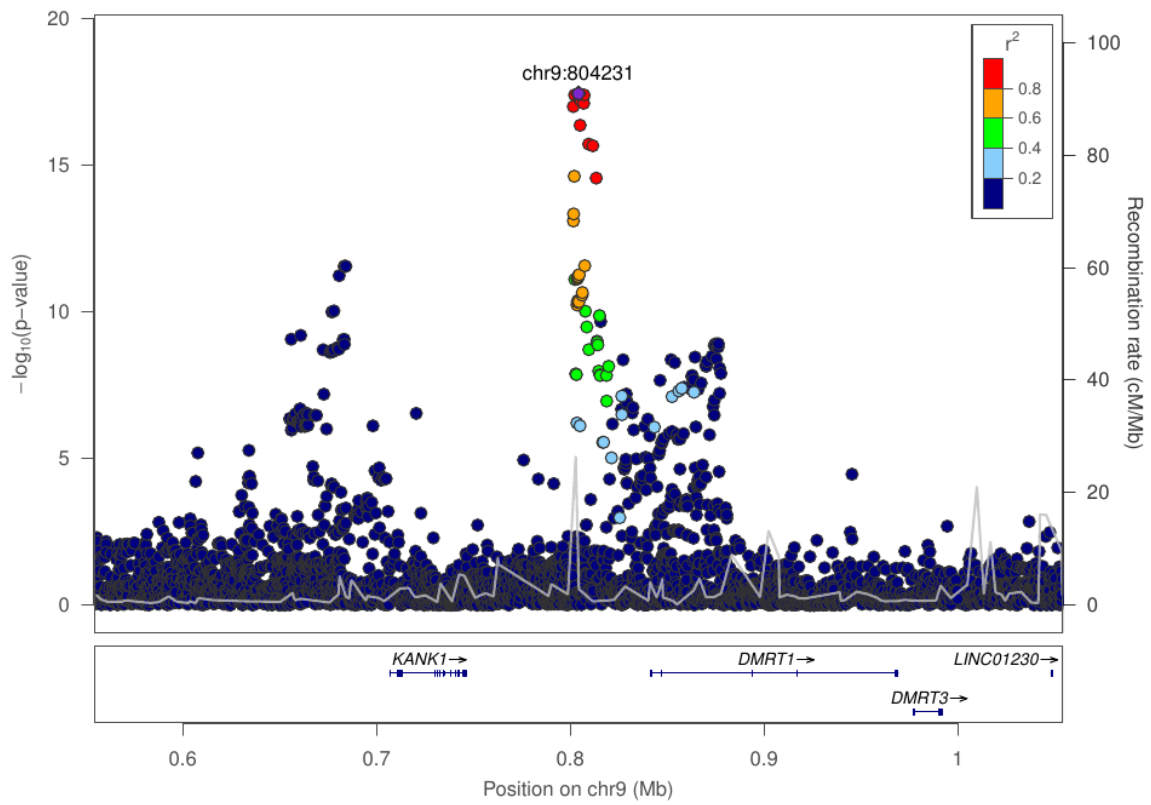

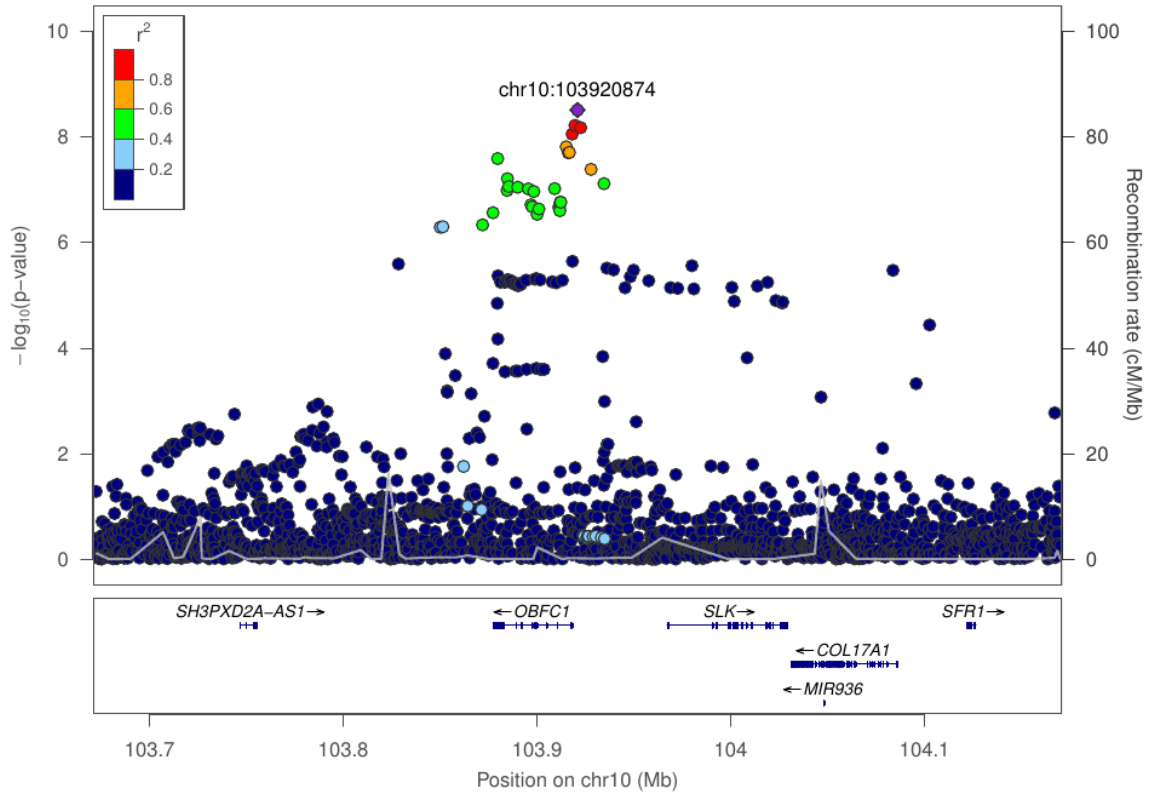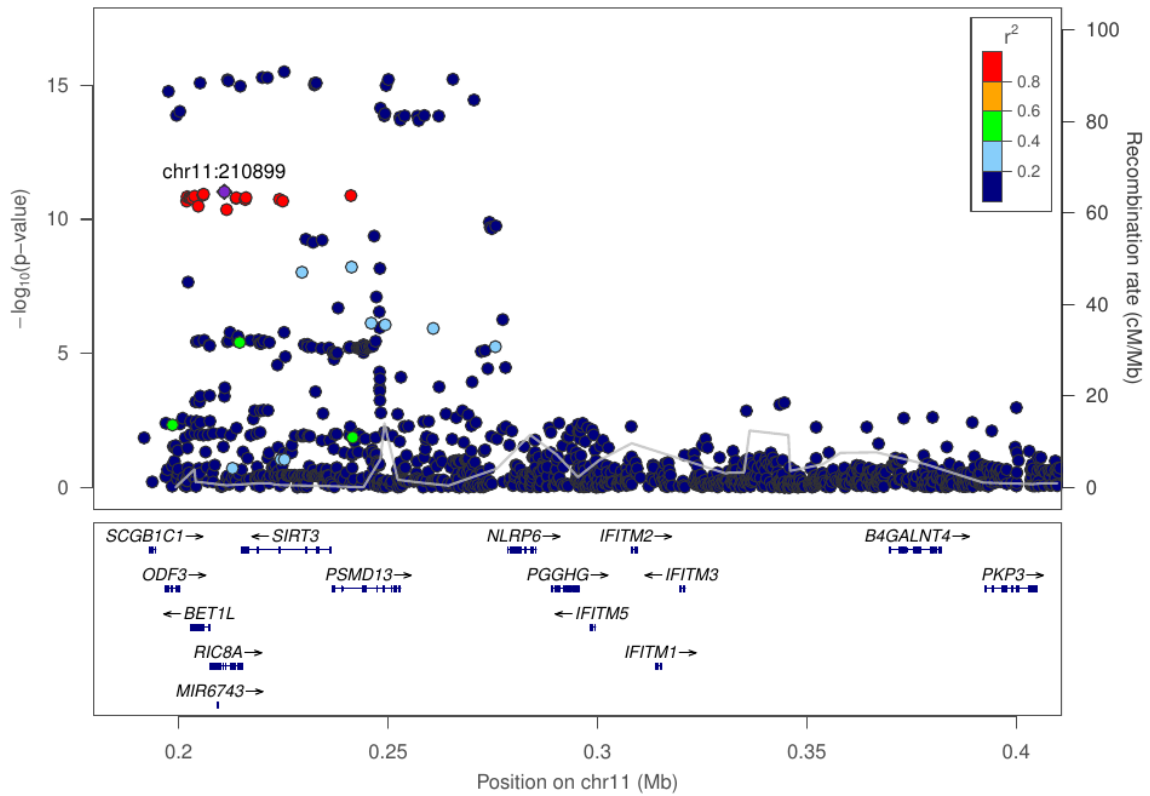



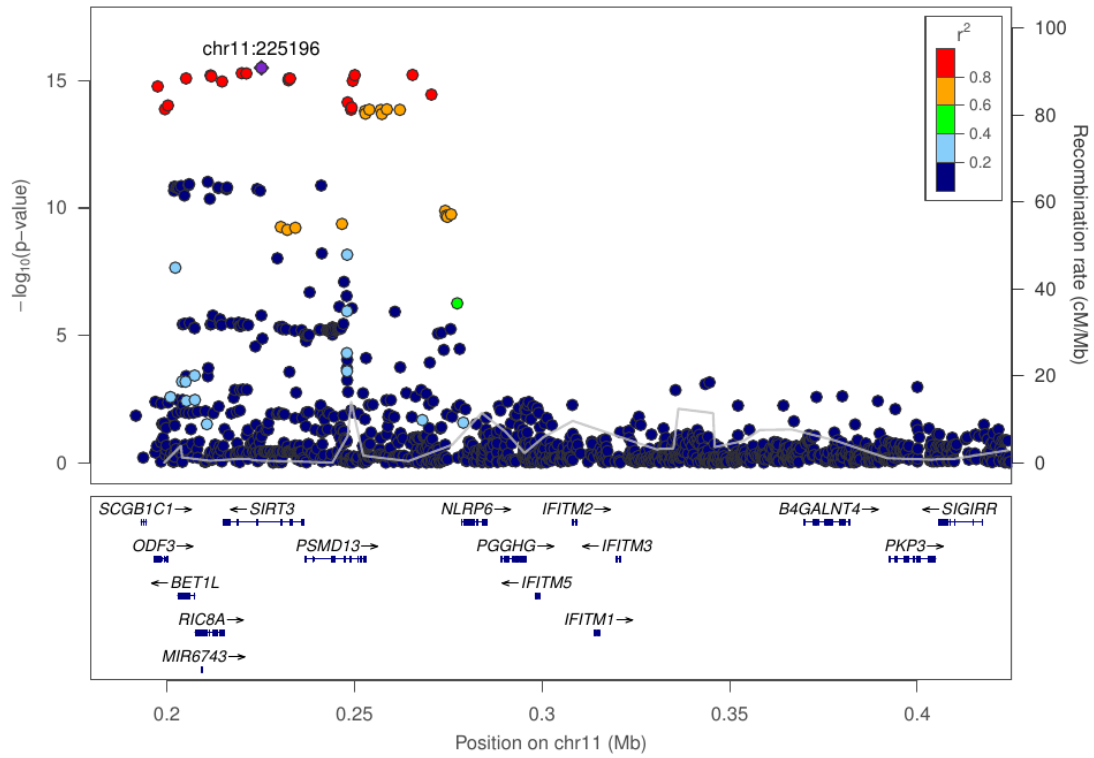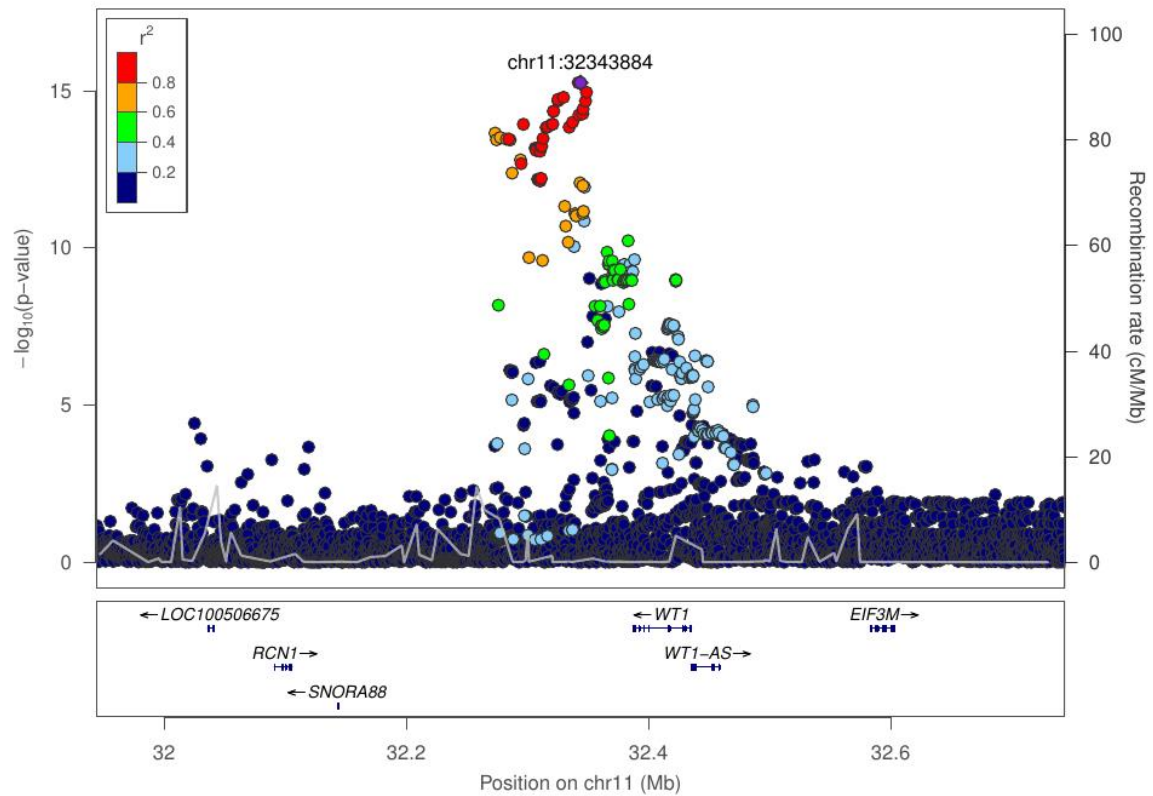



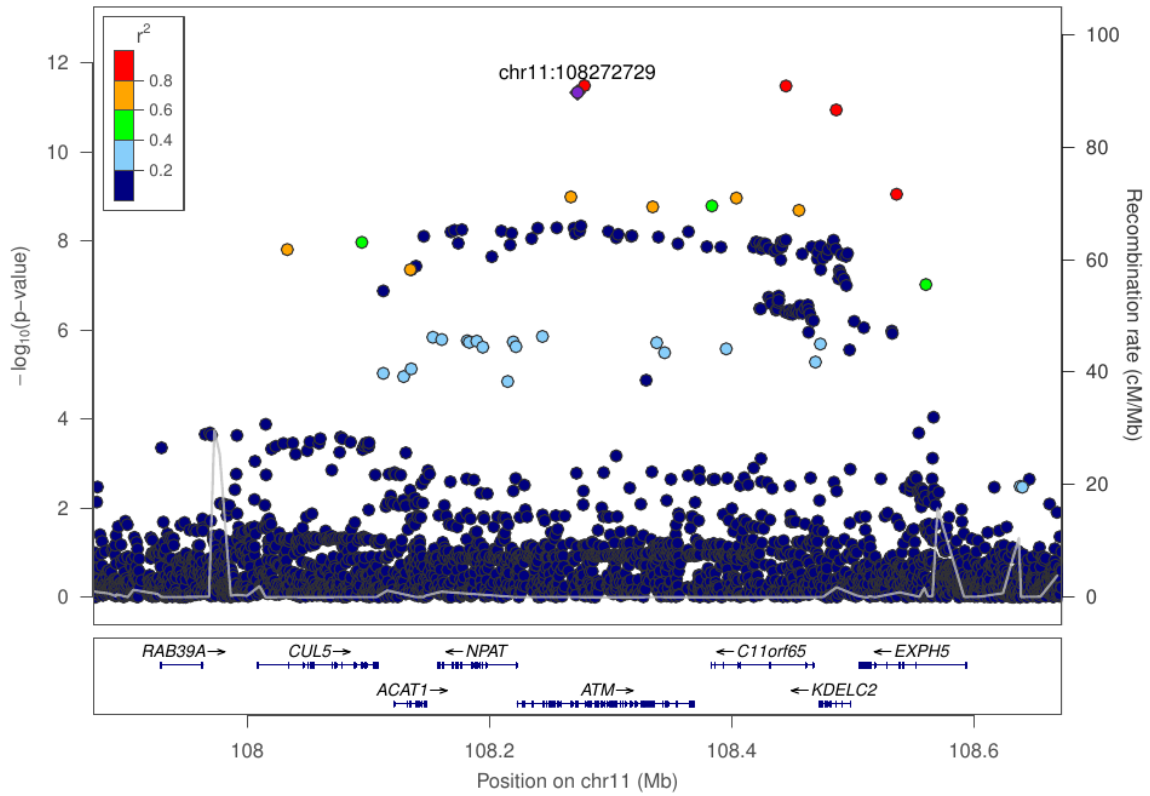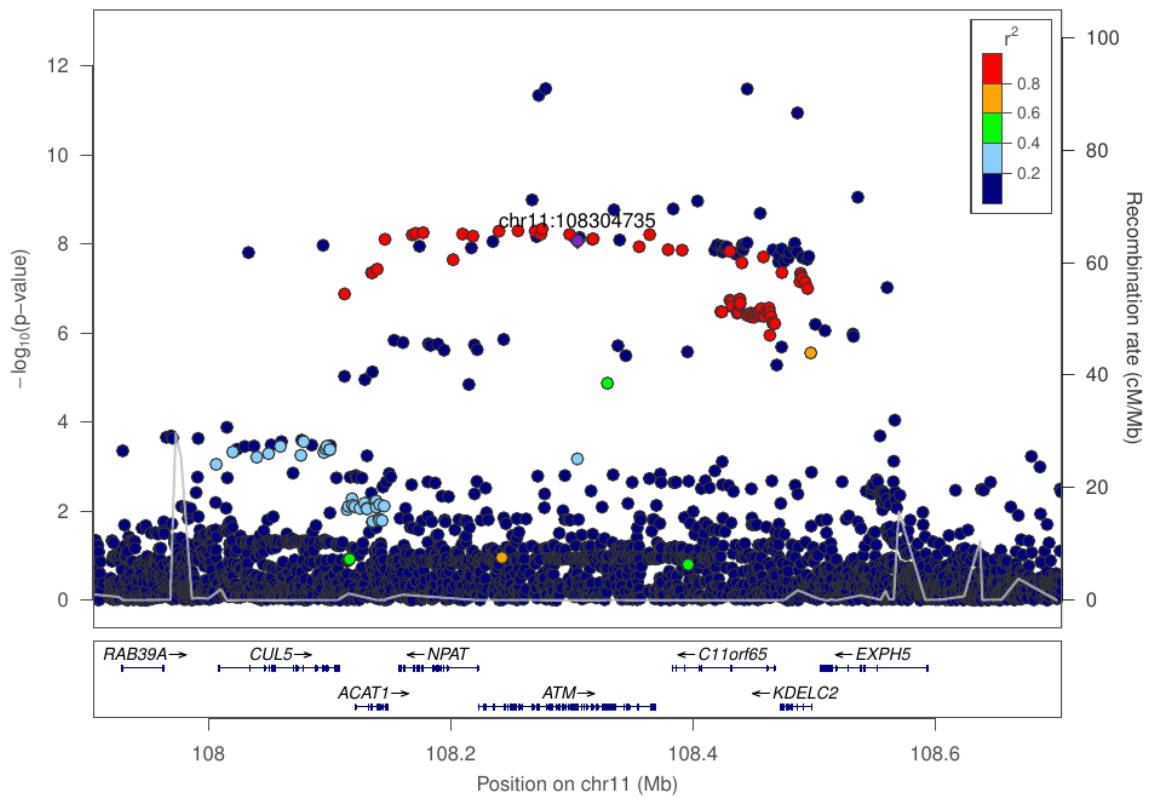

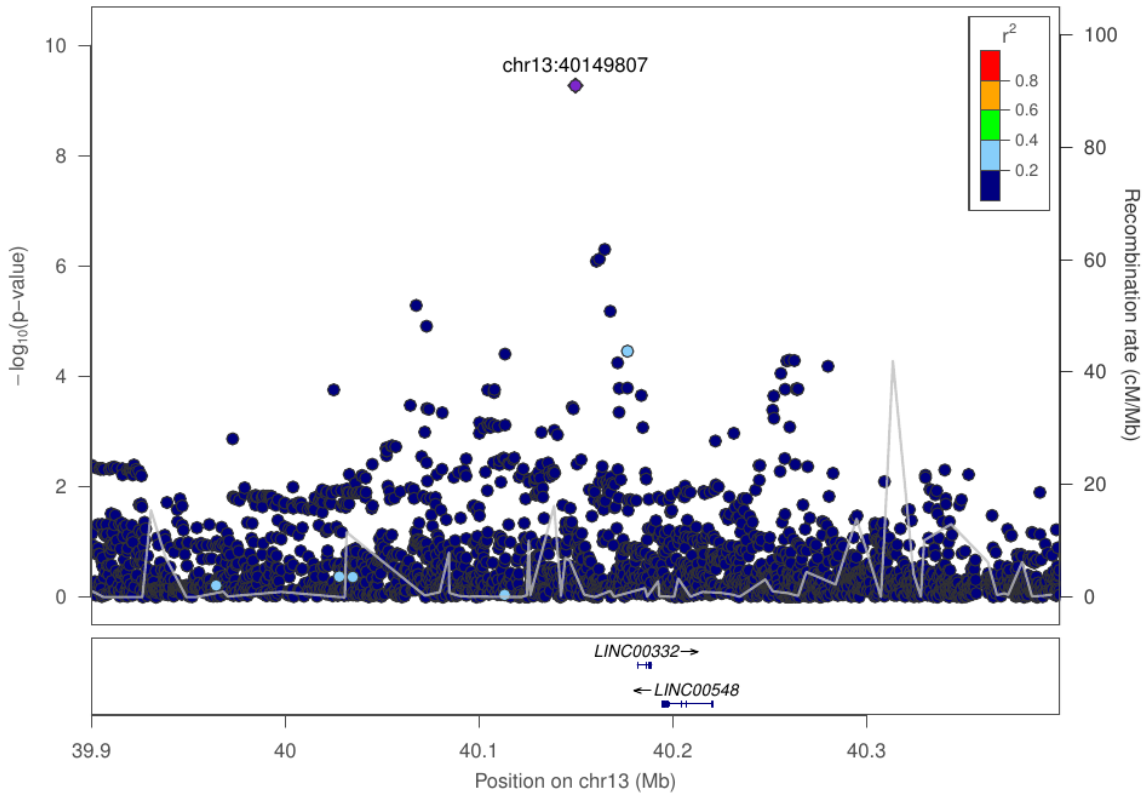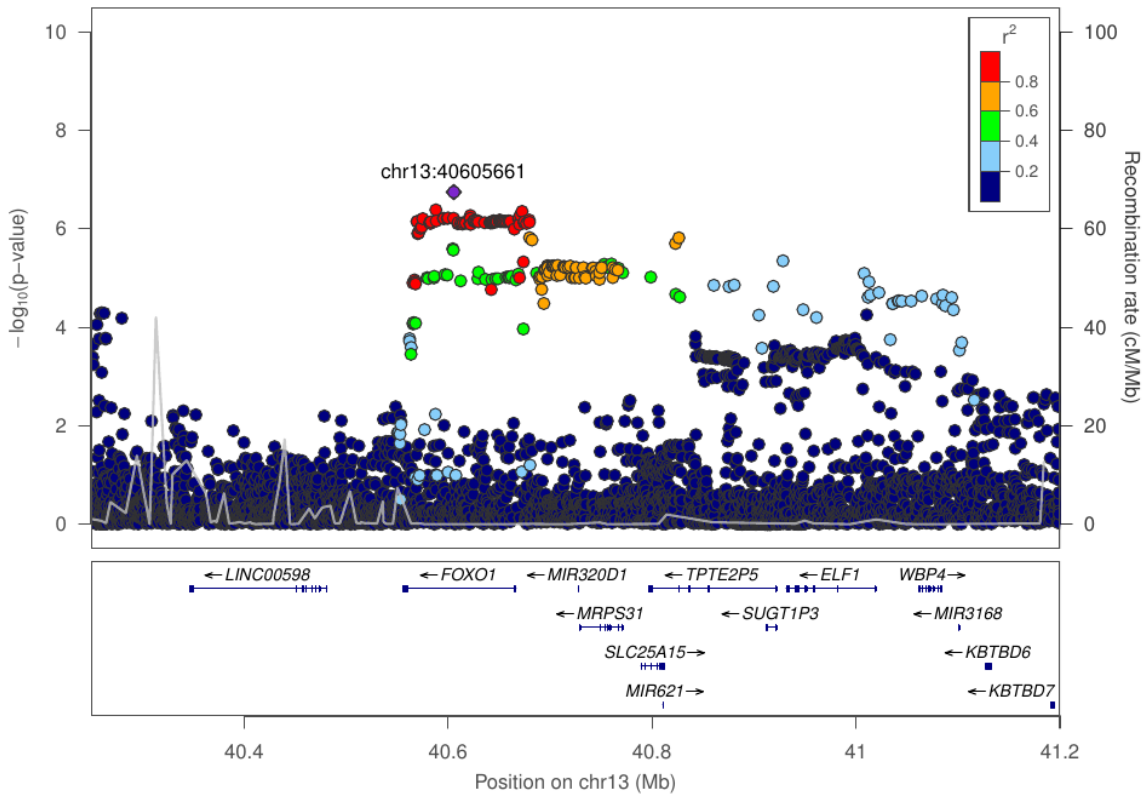

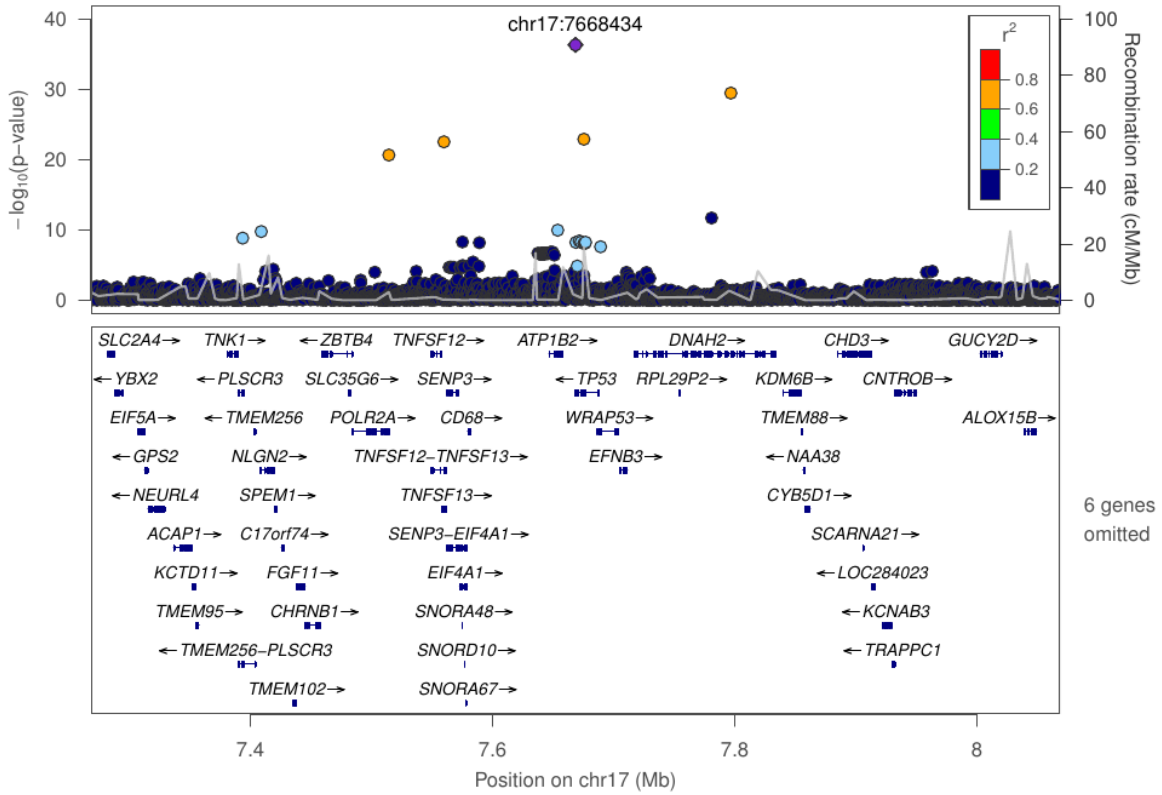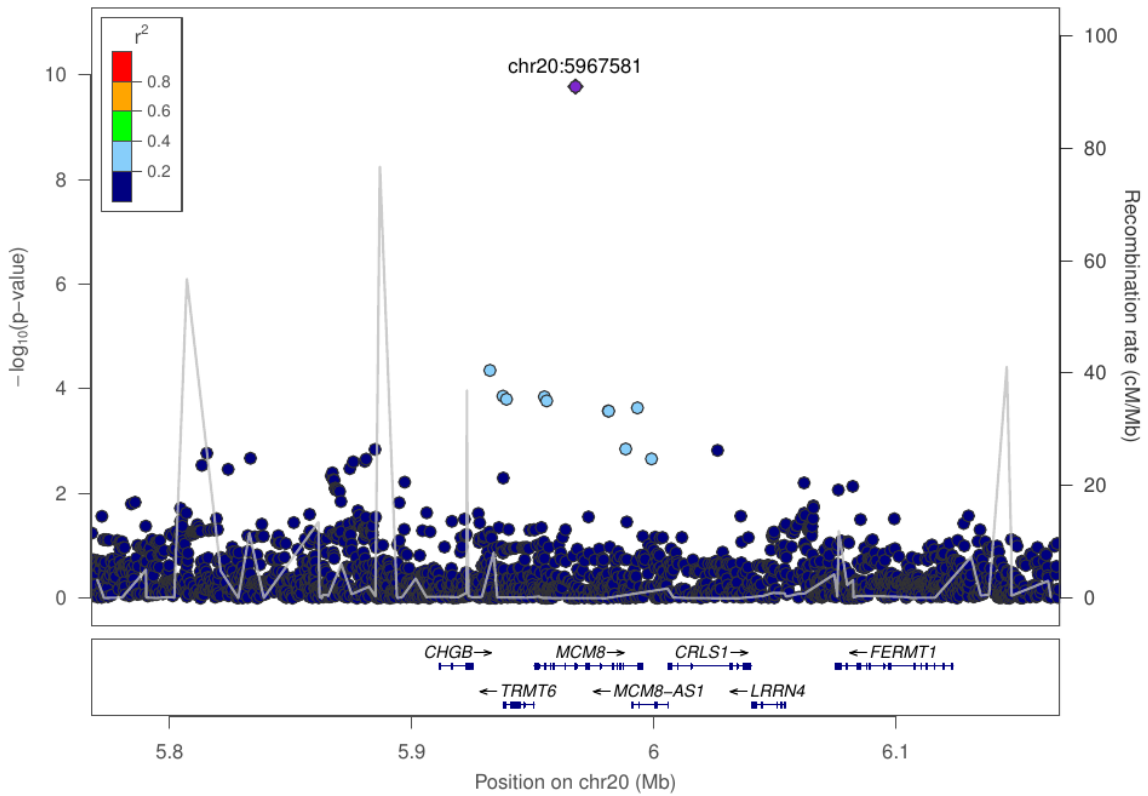

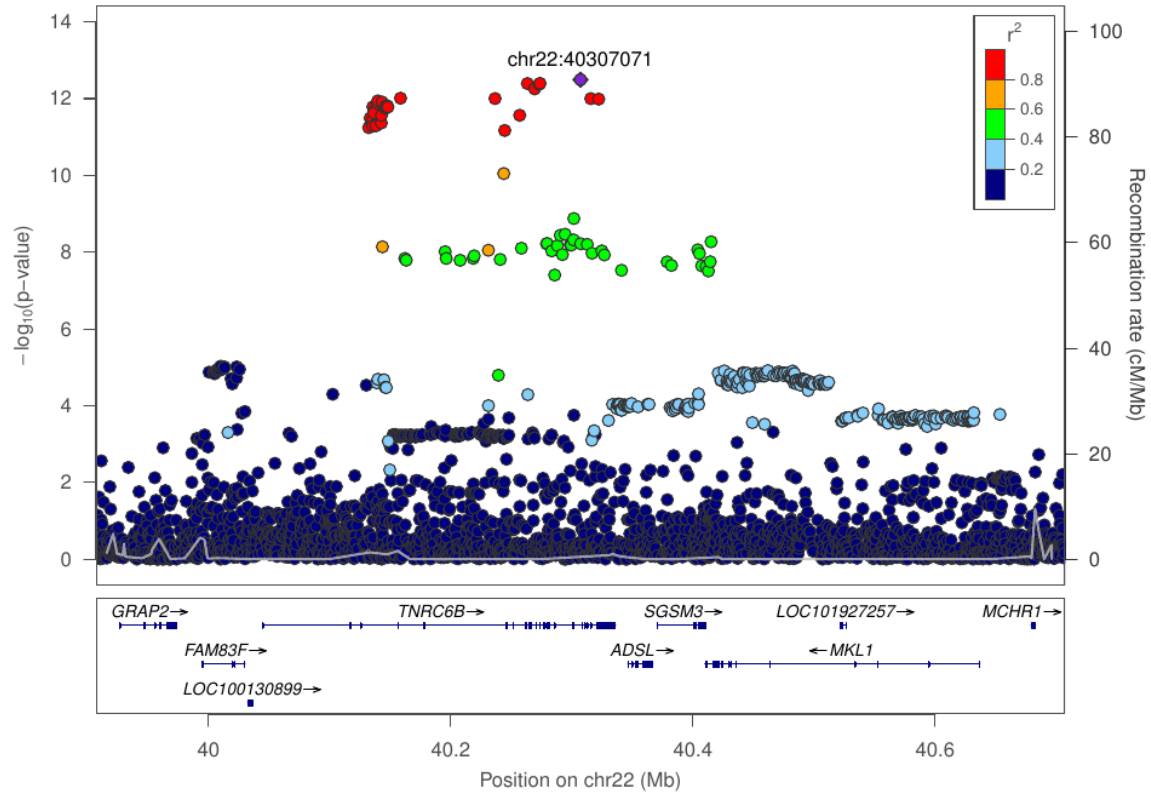

**Supplementary figure 1. Locus plots for variants associating with leiomyoma from meta-analysis of Icelandic and UK Biobank GWAS datasets.** P values ( $-\log_{10}$ ) of variant associations with leiomyoma in the meta-analysis are plotted against their NCBI Build 38 positions. Known genes in the regions are shown underneath each plot, taken from the UCSC Genes track in the UCSC Genome Browser. Only high-quality markers are displayed with a 400kb window around the lead variant.

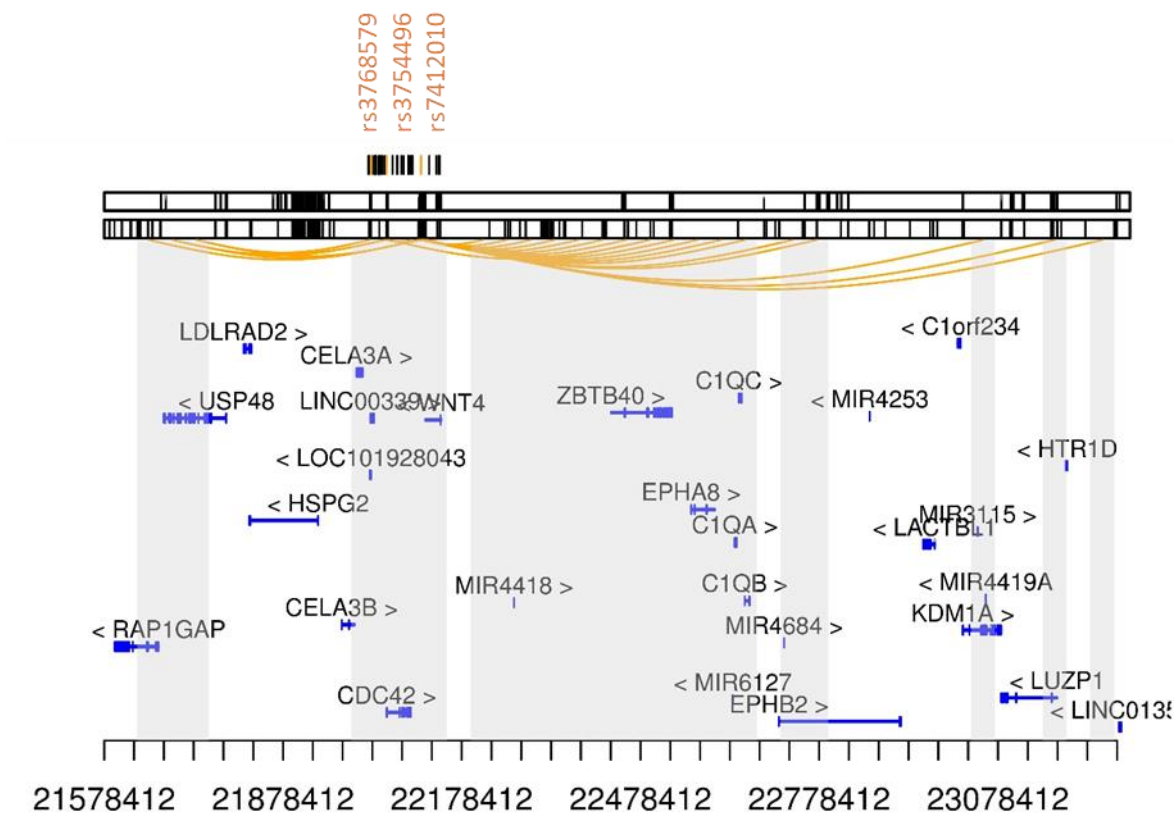

chr1

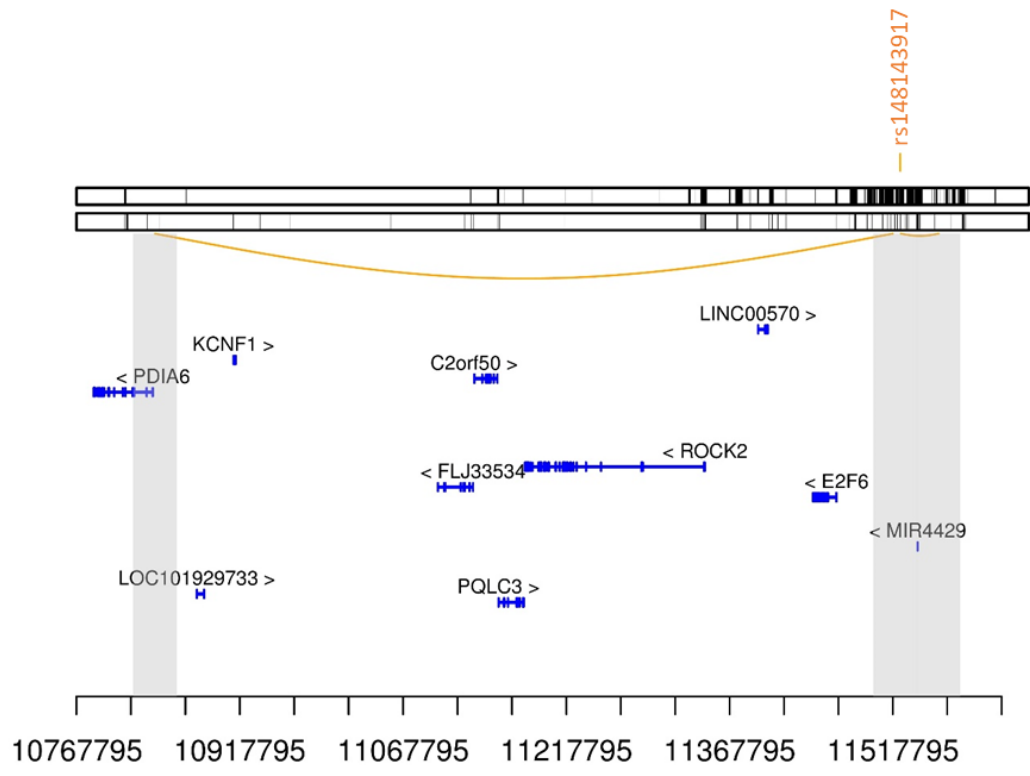

chr2

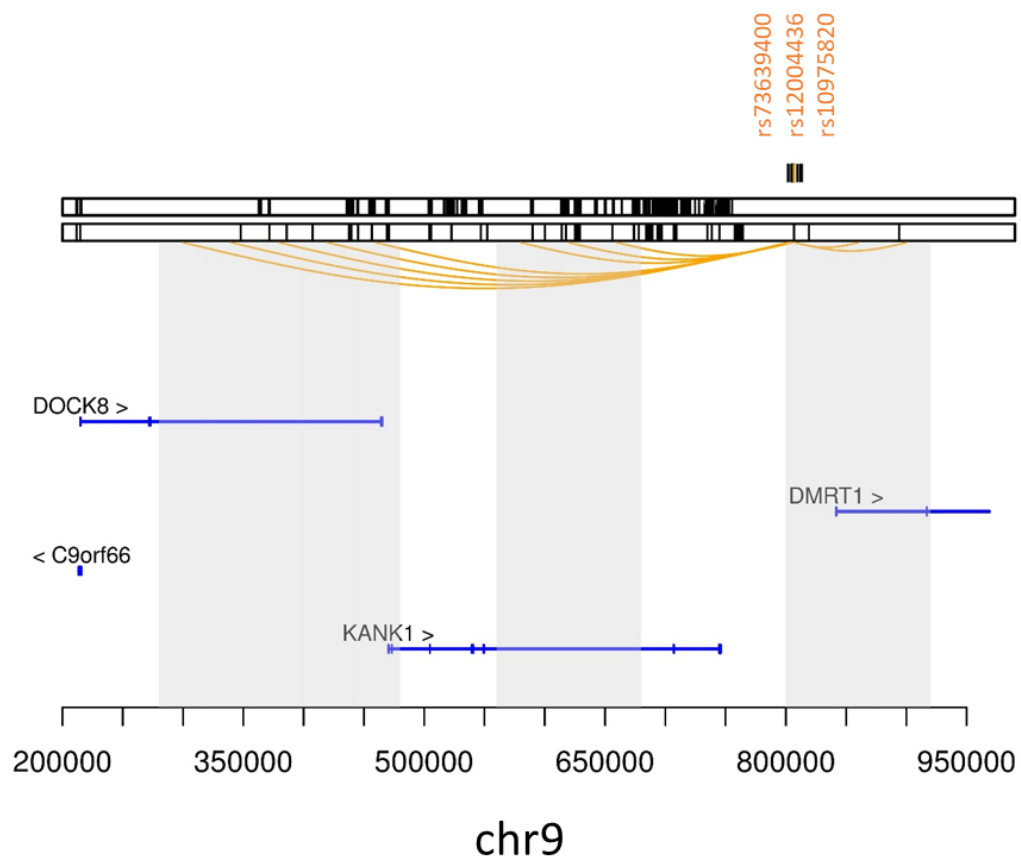



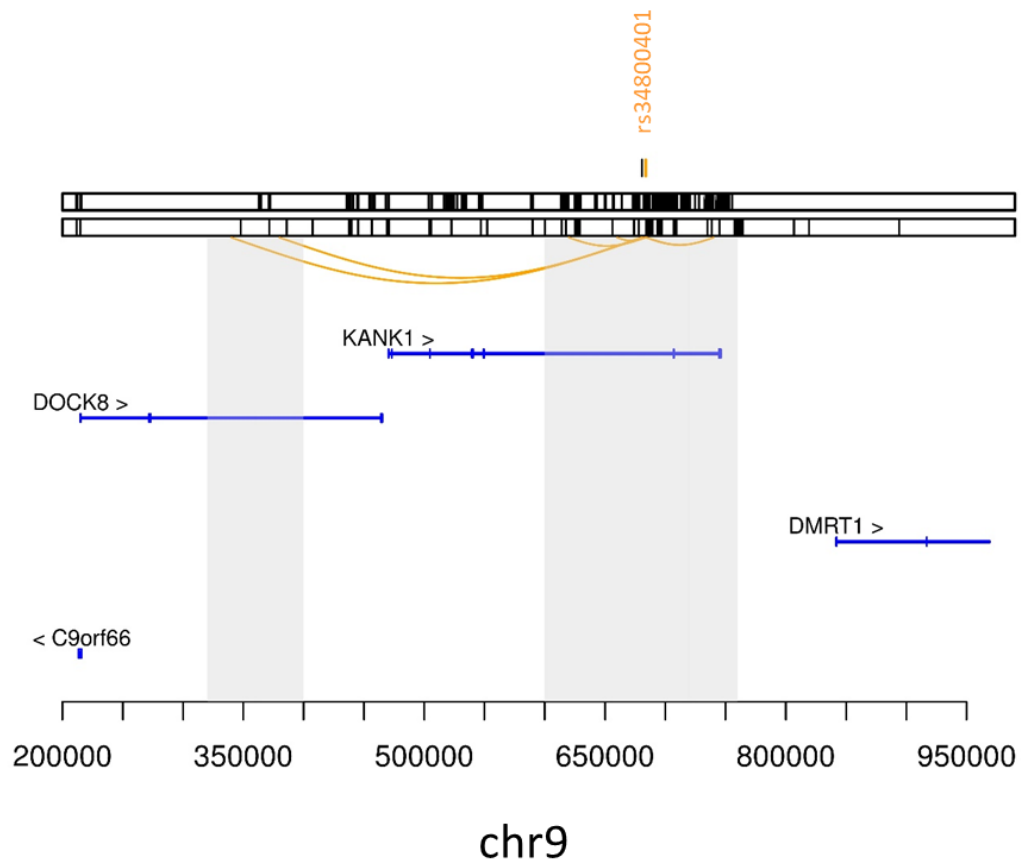

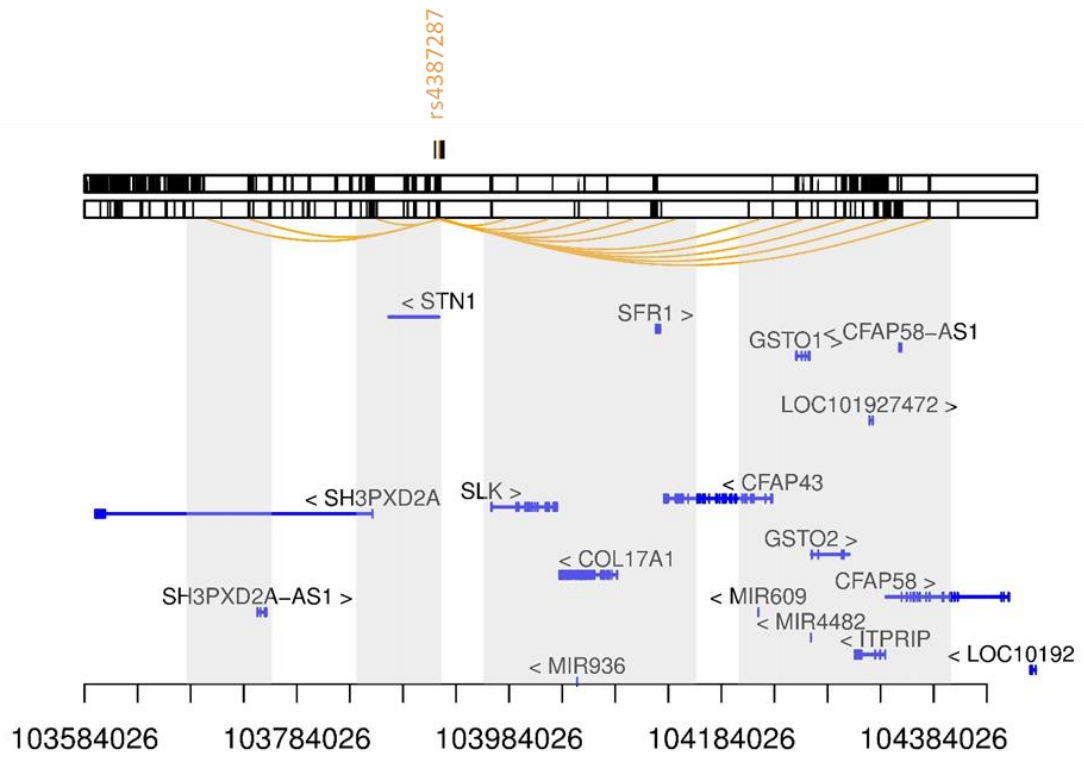

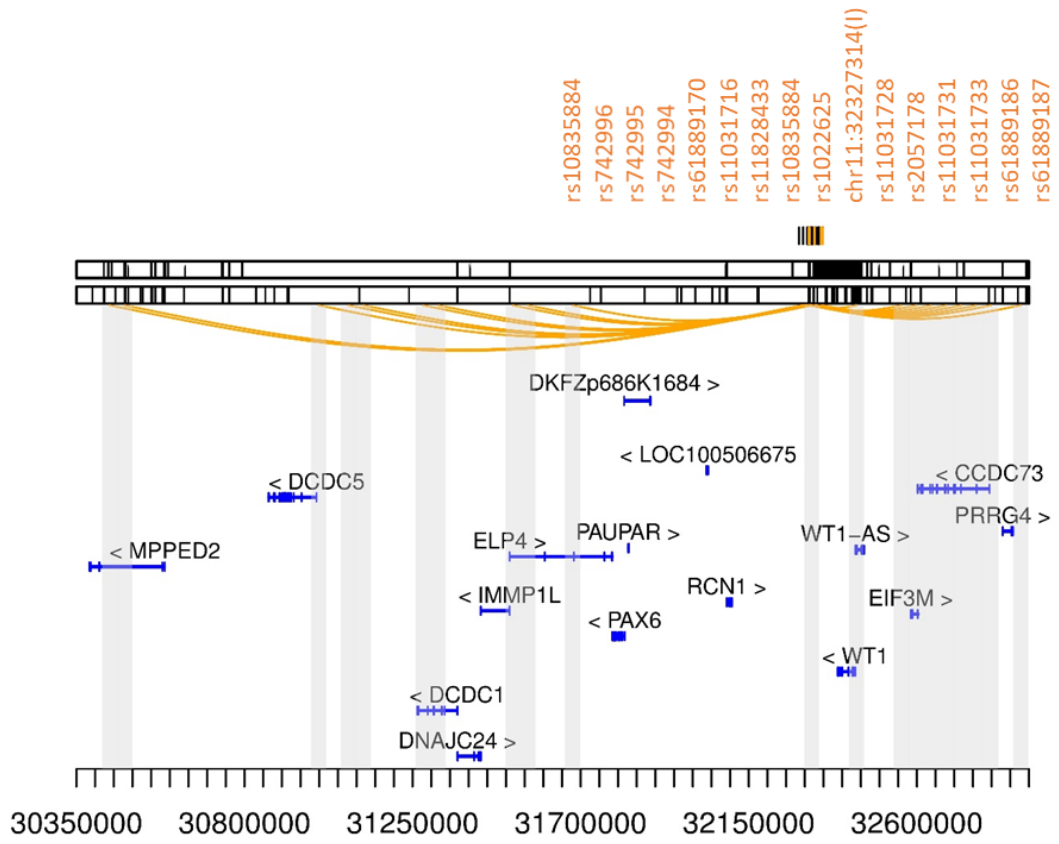

chr11

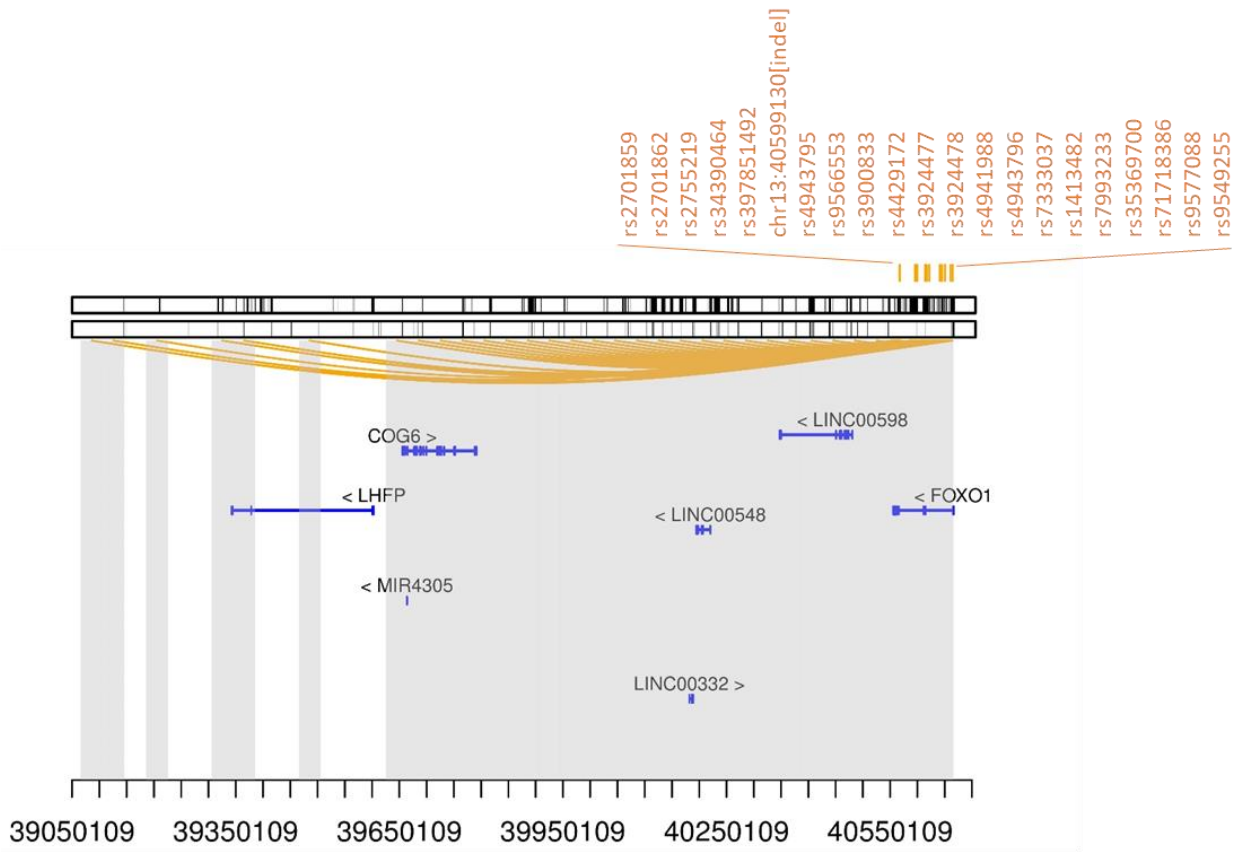

chr13

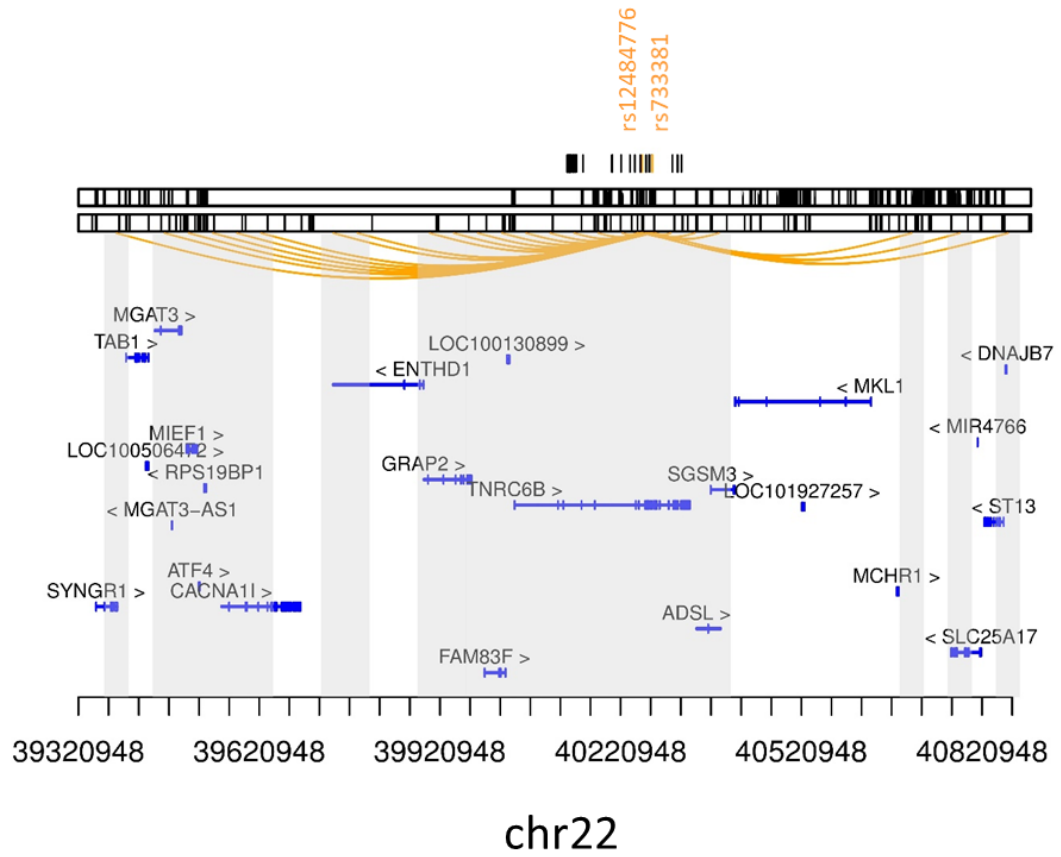

**Supplementary figure 2.** Leiomyoma risk variants intersecting with regulatory regions and their candidate target genes.
